# Supplementary material for: Repurposing FIASMAs against Acid Sphingomyelinase for COVID-19: A Computational Molecular Docking and Dynamic Simulation Approach
Source: MDPI journal article supplement (doi:10.3390/molecules28072989), 2023-03-27
Supplement: s1 [file s1]

**Supplementary Table S1:** Binding Scores of all inhibitors

| <b>Drug</b>    | <b>Affinity (kcal/mol)</b> |
|----------------|----------------------------|
| Dutasteride    | -9.7                       |
| Cepharantine   | -9.6                       |
| Zafirlukast    | -9.5                       |
| Carbenoxolone  | -9.2                       |
| Telmisartan    | -9.2                       |
| Atovaquone     | -9.1                       |
| Doxorubicin    | -8.9                       |
| Pirarubicin    | -8.9                       |
| Profenamine    | -8.7                       |
| Ritanserlin    | -8.7                       |
| Solasodine     | -8.7                       |
| Tomatidine     | -8.7                       |
| Astemizole     | -8.6                       |
| Daunorubicin   | -8.6                       |
| Diosmin        | -8.6                       |
| Droperidol     | -8.4                       |
| Montelukast    | -8.3                       |
| Flunarizine    | -8.2                       |
| SB-222200      | -8.2                       |
| Sertindole     | -8.1                       |
| Trifluoperidol | -8.1                       |
| Domperidone    | -8                         |
| Fusidic-acid   | -8                         |
| Conessine      | -7.9                       |
| Dexamethasone  | -7.9                       |
| Donepezil      | -7.9                       |
| Enoxolone      | -7.9                       |
| Lercanidipine  | -7.9                       |
| Raloxifene     | -7.9                       |
| Spiperone      | -7.9                       |
| Bromocriptine  | -7.8                       |
| Calcipotriol   | -7.8                       |
| Cinnarizine    | -7.8                       |
| Fipexide       | -7.8                       |
| Phenserine     | -7.8                       |
| Pirenperone    | -7.8                       |

|                |      |
|----------------|------|
| Progesterone   | -7.8 |
| Clofazimine    | -7.7 |
| Desloratadine  | -7.7 |
| Flavoxate      | -7.7 |
| Flupenthixol   | -7.7 |
| Idarubicin     | -7.7 |
| Stanozolol     | -7.7 |
| Sulindac       | -7.7 |
| Cypermethrin   | -7.6 |
| Fluspirilene   | -7.6 |
| Hydrocortisone | -7.6 |
| Loperamide     | -7.6 |
| Mifepristone   | -7.6 |
| Moexipril      | -7.6 |
| Nelfinavir     | -7.6 |
| Penfluridool   | -7.6 |
| Pranlukast     | -7.6 |
| Acrivastine    | -7.5 |
| Cyproheptadine | -7.5 |
| Fexofenadine   | -7.5 |
| Barnidipine    | -7.4 |
| Clebopride     | -7.4 |
| Emetine        | -7.4 |
| Haloperidol    | -7.4 |
| Loratadine     | -7.4 |
| Terfenadine    | -7.4 |
| Bromperidol    | -7.3 |
| Cisapride      | -7.3 |
| Cyclofenil     | -7.3 |
| Fulvestrant    | -7.3 |
| Indomethacin   | -7.3 |
| Quetiapine     | -7.3 |
| Cilnidipine    | -7.2 |
| Encainide      | -7.2 |
| Noscapine      | -7.2 |
| Pimethixene    | -7.2 |
| Pimozide       | -7.2 |
| Pipamperone    | -7.2 |

|                  |      |
|------------------|------|
| Tofisopam        | -7.2 |
| Yohimbine        | -7.2 |
| Zolantidine      | -7.2 |
| Azaperone        | -7.1 |
| Butenafine       | -7.1 |
| Flecainide       | -7.1 |
| Flufenamic-acid  | -7.1 |
| Flupirtine       | -7.1 |
| ketotifen        | -7.1 |
| Opipramol        | -7.1 |
| Allylestrenol    | -7   |
| AY-9944          | -7   |
| Butorphanol      | -7   |
| Carbamazepine    | -7   |
| Clozapine        | -7   |
| Fluphenazine     | -7   |
| Mianserin        | -7   |
| Retinol          | -7   |
| Apomorphin       | -6.9 |
| Chlorotrianisene | -6.9 |
| Phenothrin       | -6.9 |
| Tamoxifen        | -6.9 |
| Tirofiban        | -6.9 |
| Trifluoperazine  | -6.9 |
| Chlorprothixene  | -6.8 |
| Diazepam         | -6.8 |
| Fenspiride       | -6.8 |
| Hydroxyzin       | -6.8 |
| Mirtazapine      | -6.8 |
| Oxyphencyclimine | -6.8 |
| Phenytoin        | -6.8 |
| Repaglinide      | -6.8 |
| Tibolone         | -6.8 |
| Vinpocetine      | -6.8 |
| Warfarin         | -6.8 |
| Amorolfine       | -6.7 |
| Bepridil         | -6.7 |
| Dibenzosuberane  | -6.7 |

|                     |      |
|---------------------|------|
| Epinastine          | -6.7 |
| Fenofibrate         | -6.7 |
| Hydroquinine        | -6.7 |
| Mebhydroline        | -6.7 |
| Quinine             | -6.7 |
| Sulpiride           | -6.7 |
| Cyclobenzaprine     | -6.6 |
| Diphenylpyralin     | -6.6 |
| FG7142              | -6.6 |
| Mesoridazine        | -6.6 |
| Perphenazine        | -6.6 |
| Thioridazin         | -6.6 |
| Thioridazine        | -6.6 |
| Tiagabine           | -6.6 |
| Alaproclate         | -6.5 |
| Amitriptyline       | -6.5 |
| Benztropine         | -6.5 |
| Biperidene          | -6.5 |
| Biperiden           | -6.5 |
| Clomiphene          | -6.5 |
| Desogestrel         | -6.5 |
| Hydroxyzine         | -6.5 |
| Lynestrenol         | -6.5 |
| Maprotiline         | -6.5 |
| Meclofenamic_acid   | -6.5 |
| Mibefradil          | -6.5 |
| Paroxentine         | -6.5 |
| Rolipram            | -6.5 |
| Vincamine           | -6.5 |
| Cloricromen         | -6.4 |
| Colchicine          | -6.4 |
| Fluoxetine          | -6.4 |
| Leukomethylene_blue | -6.4 |
| Mepacrine           | -6.4 |
| Naproxen            | -6.4 |
| Papaverine          | -6.4 |
| Pridinol            | -6.4 |
| Sertraline          | -6.4 |

|                  |      |
|------------------|------|
| Triprolidine     | -6.4 |
| Aprindine        | -6.3 |
| Atropine         | -6.3 |
| Betaxolol        | -6.3 |
| Diltiazeml       | -6.3 |
| Doxepin          | -6.3 |
| Ibuprofen        | -6.3 |
| Mebeverine       | -6.3 |
| Nortriptyline    | -6.3 |
| Trihexyphenidyl  | -6.3 |
| Amiodarone       | -6.2 |
| Antazoline       | -6.2 |
| Benzbromarone    | -6.2 |
| Citalopram       | -6.2 |
| Clemastine       | -6.2 |
| Isoxsuprine      | -6.2 |
| Lamotrigine      | -6.2 |
| Pergolide        | -6.2 |
| Perhexiline      | -6.2 |
| Phentolamine     | -6.2 |
| Procyclidine     | -6.2 |
| Carvedilol       | -6.1 |
| Disopyramide     | -6.1 |
| Lofepramine      | -6.1 |
| Norfluoxetine    | -6.1 |
| Propafenone      | -6.1 |
| Protriptyline    | -6.1 |
| Uridine          | -6.1 |
| Ambroxol         | -6   |
| Dextromethorphan | -6   |
| Fendiline        | -6   |
| Harmine          | -6   |
| Naphazoline      | -6   |
| Tacrine          | -6   |
| Tramadol         | -6   |
| Triflupromazine  | -6   |
| Trimipramine     | -6   |
| Venlafaxine      | -6   |

|                  |      |
|------------------|------|
| Amlodipine       | -5.9 |
| Cibenzoline      | -5.9 |
| Cyclazocine      | -5.9 |
| Imipramine       | -5.9 |
| Reboxentine      | -5.9 |
| Sparteine        | -5.9 |
| Bromhexine       | -5.8 |
| Clomipramine     | -5.8 |
| Diphenhydramine  | -5.8 |
| Mitotane         | -5.8 |
| Orphenadrine     | -5.8 |
| Oxolamine        | -5.8 |
| Quinacrine       | -5.8 |
| Xylometazoline   | -5.8 |
| Benfluorex       | -5.7 |
| Brompheniramine  | -5.7 |
| Carbetapentane   | -5.7 |
| Chloroquine      | -5.7 |
| Chlorpheniramine | -5.7 |
| Cloperastine     | -5.7 |
| Cyclopentolate   | -5.7 |
| Drofenine        | -5.7 |
| Fluvoxamine      | -5.7 |
| Oxybutynine      | -5.7 |
| Oxymetazoline    | -5.7 |
| Promazin         | -5.7 |
| Promazine        | -5.7 |
| Desipramine      | -5.6 |
| Ethopropazine    | -5.6 |
| Promethazin      | -5.6 |
| Promethazine     | -5.6 |
| Pyrilamine       | -5.6 |
| Tripelennamine   | -5.6 |
| Chloropyramine   | -5.5 |
| Chlorpromazine   | -5.5 |
| Dicyclomine      | -5.5 |
| Etomidate        | -5.5 |
| Fenfluramine     | -5.5 |

|                              |      |
|------------------------------|------|
| Proparacaine                 | -5.5 |
| Ropinirole                   | -5.5 |
| Alprenolol                   | -5.4 |
| Bromopride                   | -5.4 |
| Chlorquinaldol               | -5.4 |
| Dienestrol                   | -5.4 |
| Gabapentin                   | -5.3 |
| Propranolol                  | -5.3 |
| Tetracaine                   | -5.3 |
| Lidocaine                    | -5.2 |
| Moxisylyte                   | -5.2 |
| Oxeladin                     | -5.2 |
| Paraxanthine                 | -5.2 |
| Camylofin                    | -5.1 |
| Clonidine                    | -5.1 |
| Metoclopramide               | -5.1 |
| Suloctidil                   | -5.1 |
| Clenbuterol                  | -5   |
| Gentisic_acid                | -5   |
| Alverine                     | -4.9 |
| Bupropion                    | -4.9 |
| D_Mannitol                   | -4.9 |
| Methapyrilene                | -4.8 |
| Phenylmethysulfonyl_flouride | -4.8 |
| Tulobuterol                  | -4.8 |
| Memantine                    | -4.7 |
| Rimantadine                  | -4.6 |
| L_Leucine_methyl_ester       | -4.4 |
| Mecamylamine                 | -4.3 |
| Amantadine                   | -4.1 |
| Putrescine                   | -3.2 |
